# Supplementary material
Source: publisher figshare collection journal article supplement (https://acs.figshare.com/ndownloader/files/4099567)

# Supporting Information

## Clerodane Diterpenoids from *Croton crassifolius*

Guo-Cai Wang,<sup>†, ‡, §</sup> Jia-Gui Li,<sup>†, ‡, §</sup> Guo-Qian Li,<sup>†, ‡</sup> Jiao-Jiao Xu,<sup>†, ‡</sup> Xia Wu,<sup>†, ‡</sup>

Wen-Cai Ye,<sup>†, ‡</sup> Yao-Lan Li,<sup>\*, †, ‡</sup>

<sup>†</sup> Institute of Traditional Chinese Medicine and Natural Products, Jinan University, Guangzhou 510632, China

<sup>‡</sup> Guangdong Province Key Laboratory of Pharmacodynamic Constituents of TCM and New Drug Research, and JNU-HKUST Joint Laboratory for Neuroscience and Innovative Drug Research, Guangzhou 510632, China

<sup>§</sup> The authors contributed equally to this work.

## List of Figures

- S1.**  $^1\text{H}$  NMR spectrum (400 MHz) of compound **1** in  $\text{CDCl}_3$
- S2.**  $^{13}\text{C}$  NMR spectrum (100 MHz) of compound **1** in  $\text{CDCl}_3$
- S3.**  $^1\text{H}$  NMR spectrum (400 MHz) of compound **2** in  $\text{CDCl}_3$
- S4.**  $^{13}\text{C}$  NMR spectrum (100 MHz) of compound **2** in  $\text{CDCl}_3$
- S5.**  $^1\text{H}$  NMR spectrum (400 MHz) of compound **3** in  $\text{CDCl}_3$
- S6.**  $^{13}\text{C}$  NMR spectrum (100 MHz) of compound **3** in  $\text{CDCl}_3$
- S7.**  $^1\text{H}$  NMR spectrum (400 MHz) of compound **4** in  $\text{CD}_3\text{OD}$
- S8.**  $^{13}\text{C}$  NMR spectrum (100 MHz) of compound **4** in  $\text{CD}_3\text{OD}$
- S9.**  $^1\text{H}$  NMR spectrum (400 MHz) of compound **5** in  $\text{CD}_3\text{OD}$
- S10.**  $^{13}\text{C}$  NMR spectrum (100 MHz) of compound **5** in  $\text{CD}_3\text{OD}$
- S11.**  $^1\text{H}$  NMR spectrum (400 MHz) of compound **6** in  $\text{CD}_3\text{OD}$
- S12.**  $^{13}\text{C}$  NMR spectrum (100 MHz) of compound **6** in  $\text{CD}_3\text{OD}$
- S13.**  $^1\text{H}$  NMR spectrum (400 MHz) of compound **7** in  $\text{CD}_3\text{OD}$
- S14.**  $^{13}\text{C}$  NMR spectrum (100 MHz) of compound **7** in  $\text{CD}_3\text{OD}$
- S15.** CD spectra of **4-8** and **13**

**S1.**  $^1\text{H}$  NMR spectrum (400 MHz) of compound **1** in  $\text{CDCl}_3$

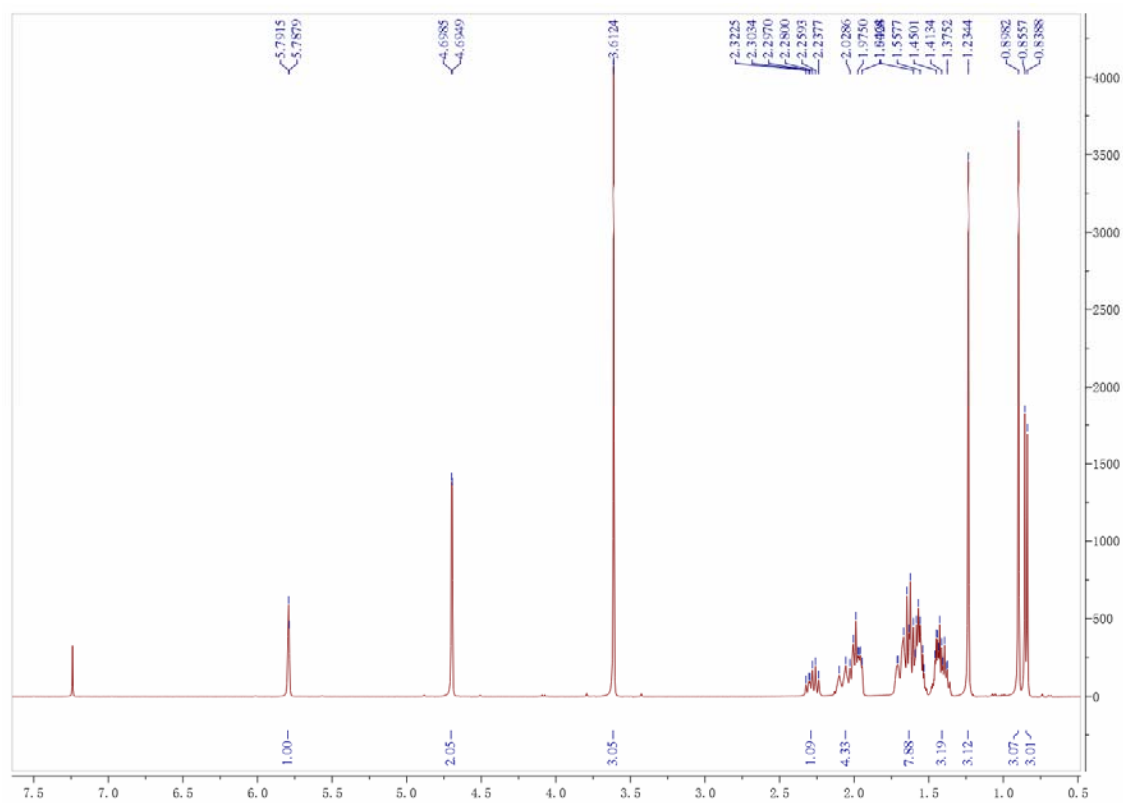

**S2.**  $^{13}\text{C}$  NMR spectrum (100 MHz) of compound **1** in  $\text{CDCl}_3$

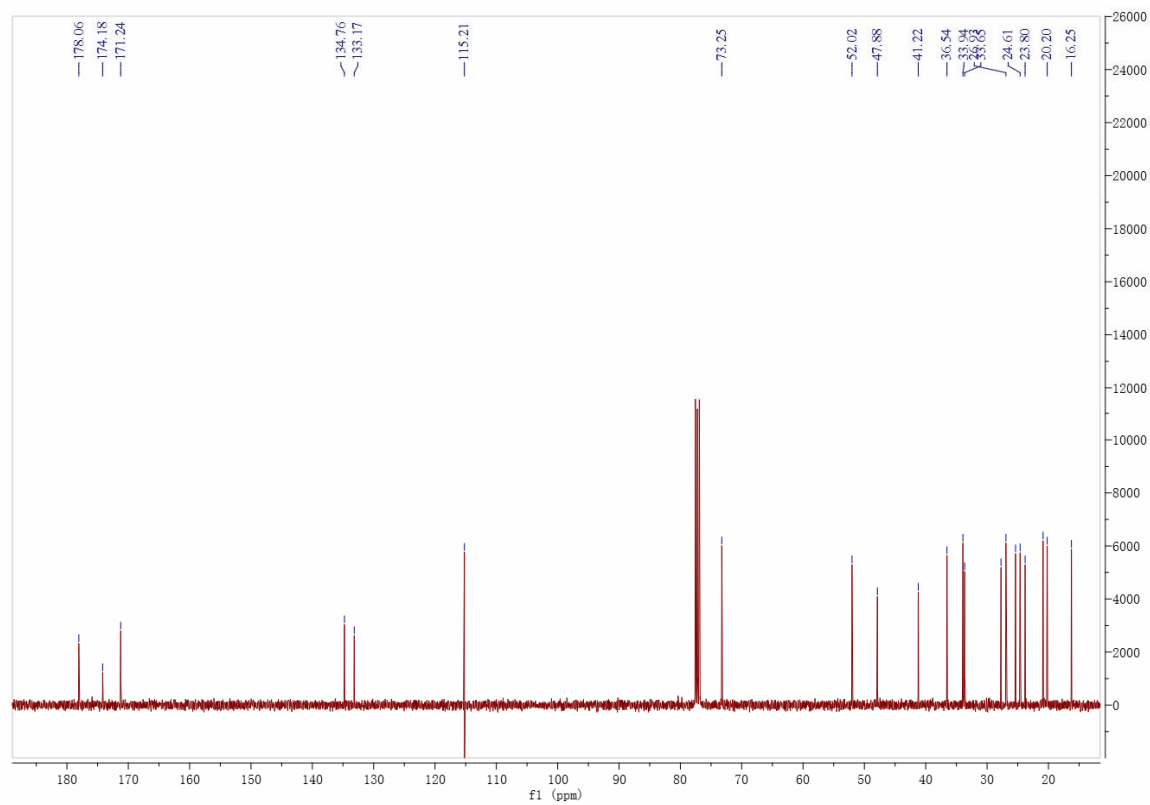

**S3.**  $^1\text{H}$  NMR spectrum (400 MHz) of compound **2** in  $\text{CDCl}_3$

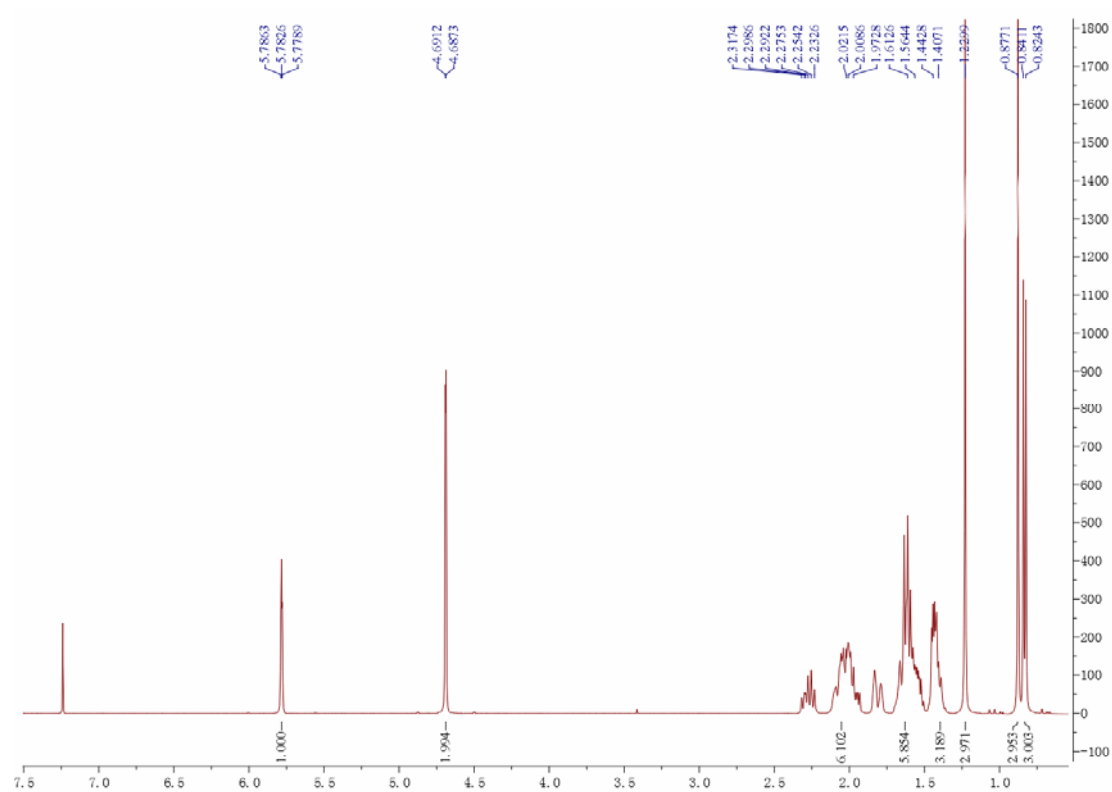

**S4.**  $^{13}\text{C}$  NMR spectrum (100 MHz) of compound **2** in  $\text{CDCl}_3$

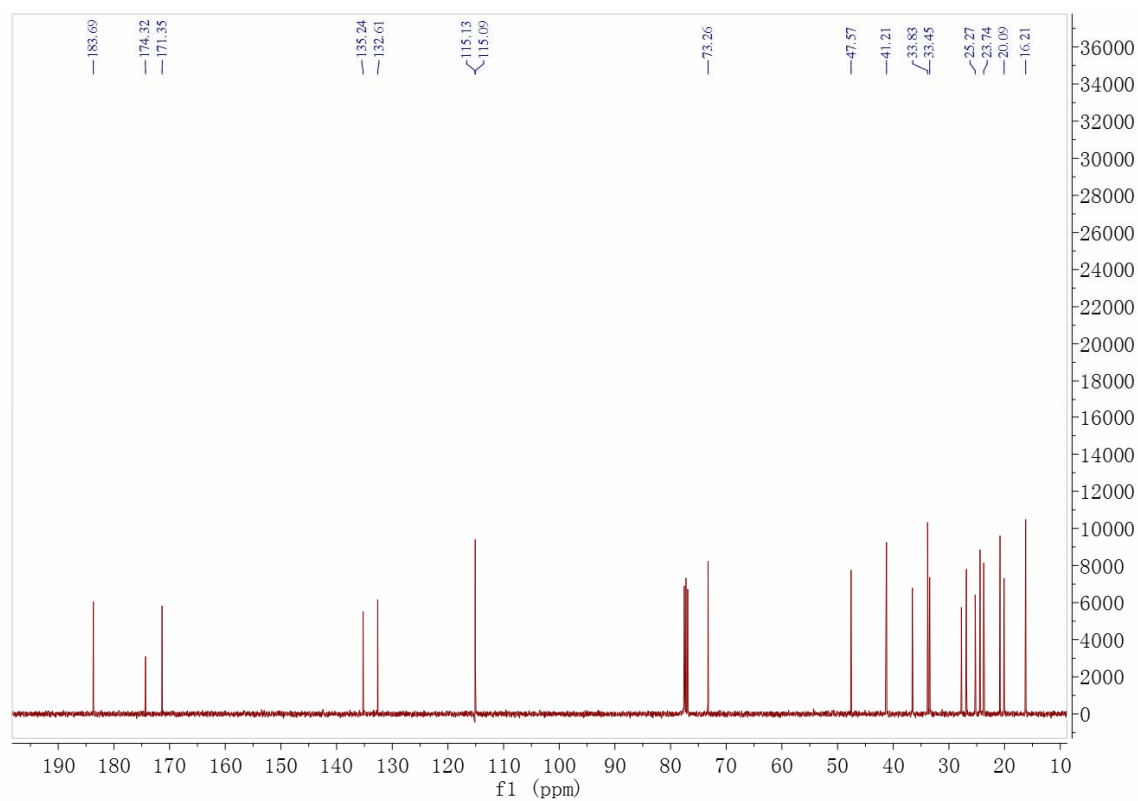

**S5.**  $^1\text{H}$  NMR spectrum (400 MHz) of compound **3** in  $\text{CDCl}_3$

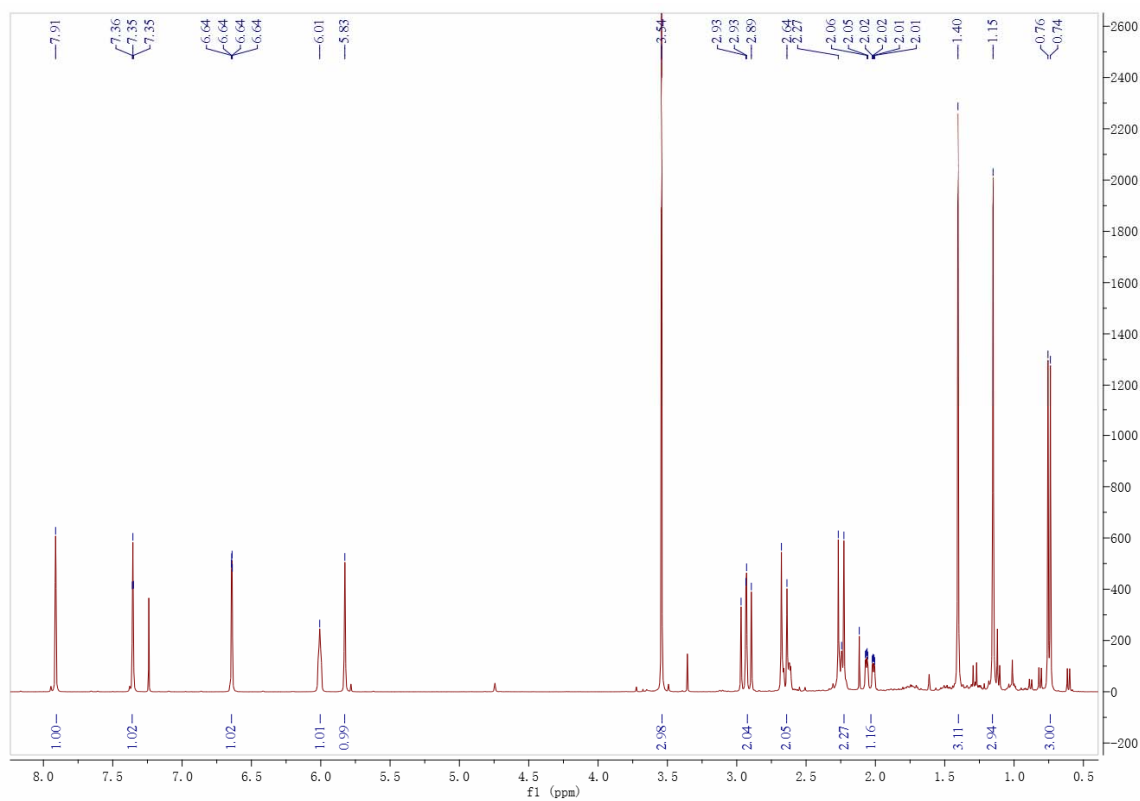

**S6.**  $^{13}\text{C}$  NMR spectrum (100 MHz) of compound **3** in  $\text{CDCl}_3$

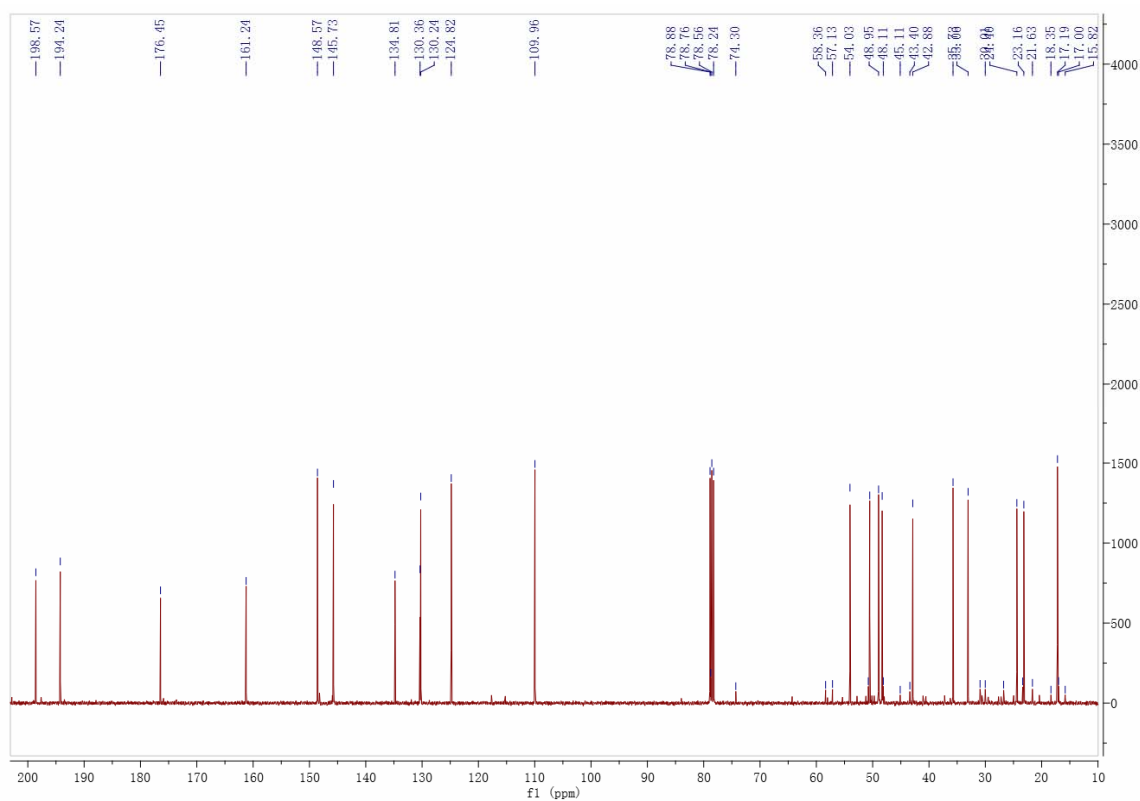

**S7.**  $^1\text{H}$  NMR spectrum (400 MHz) of compound **4** in  $\text{CD}_3\text{OD}$

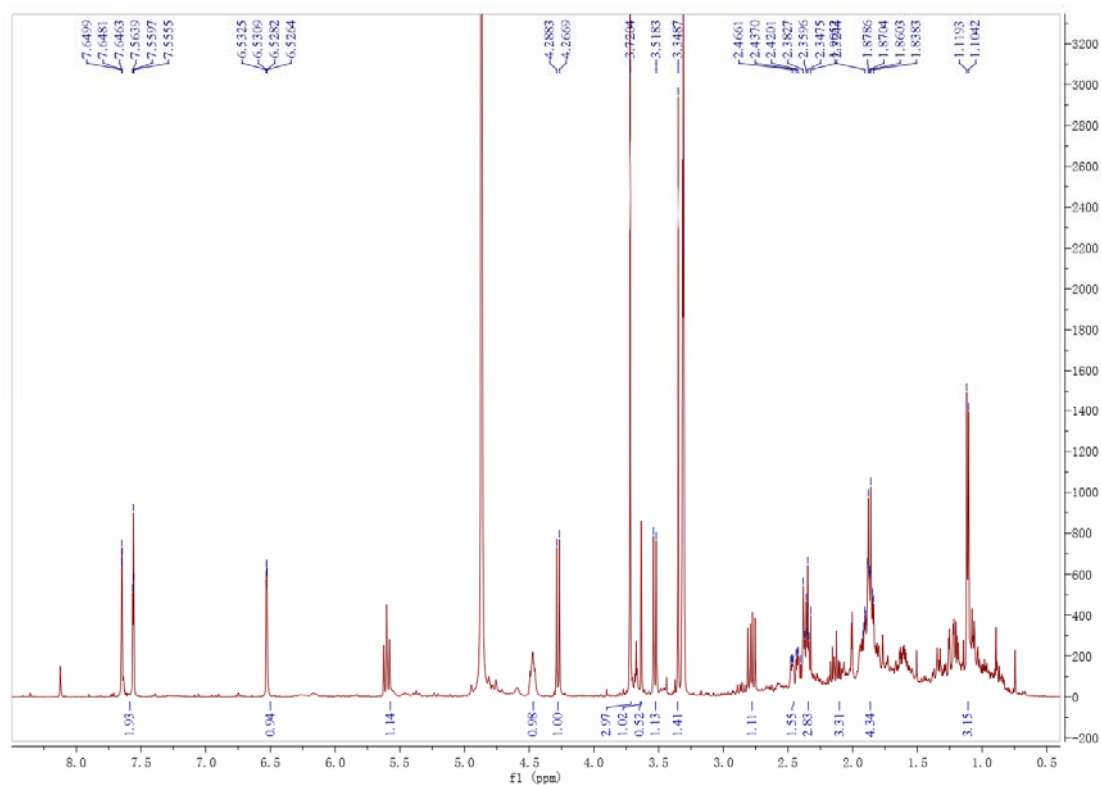

**S8.**  $^{13}\text{C}$  NMR spectrum (100 MHz) of compound **4** in  $\text{CD}_3\text{OD}$

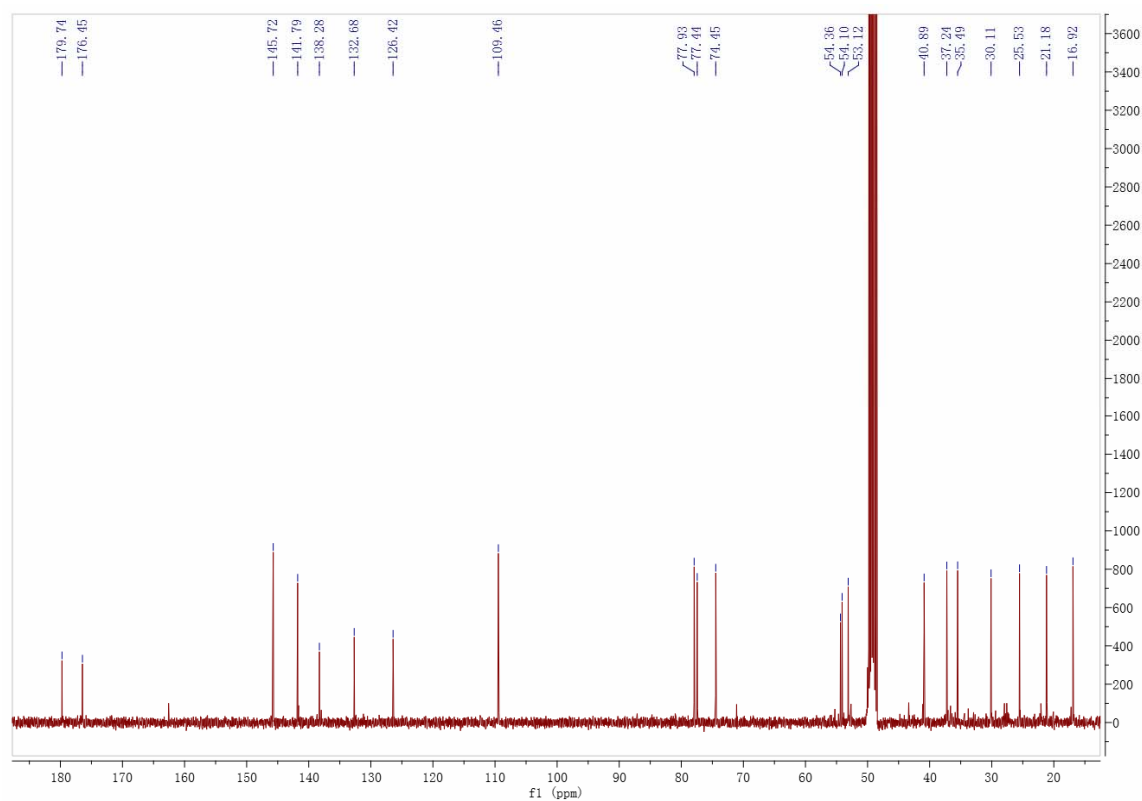

**S9.**  $^1\text{H}$  NMR spectrum (400 MHz) of compound **5** in  $\text{CD}_3\text{OD}$

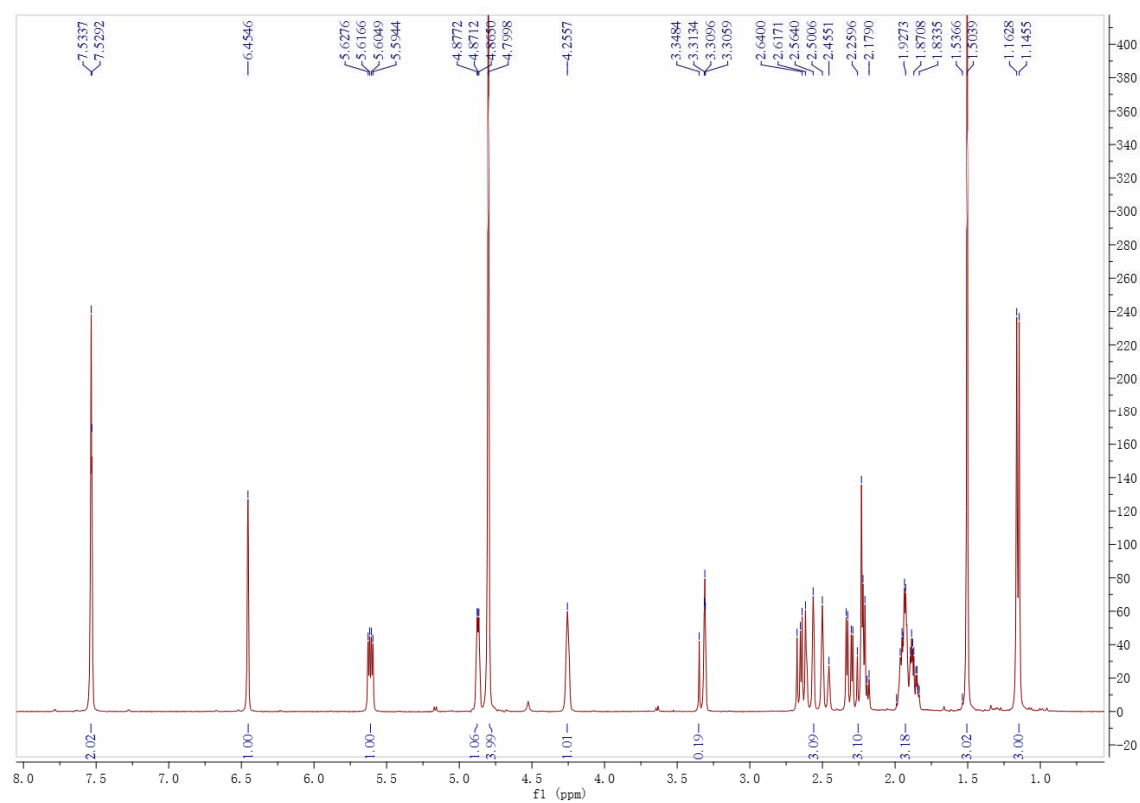

**S10.**  $^{13}\text{C}$  NMR spectrum (100 MHz) of compound **5** in  $\text{CD}_3\text{OD}$

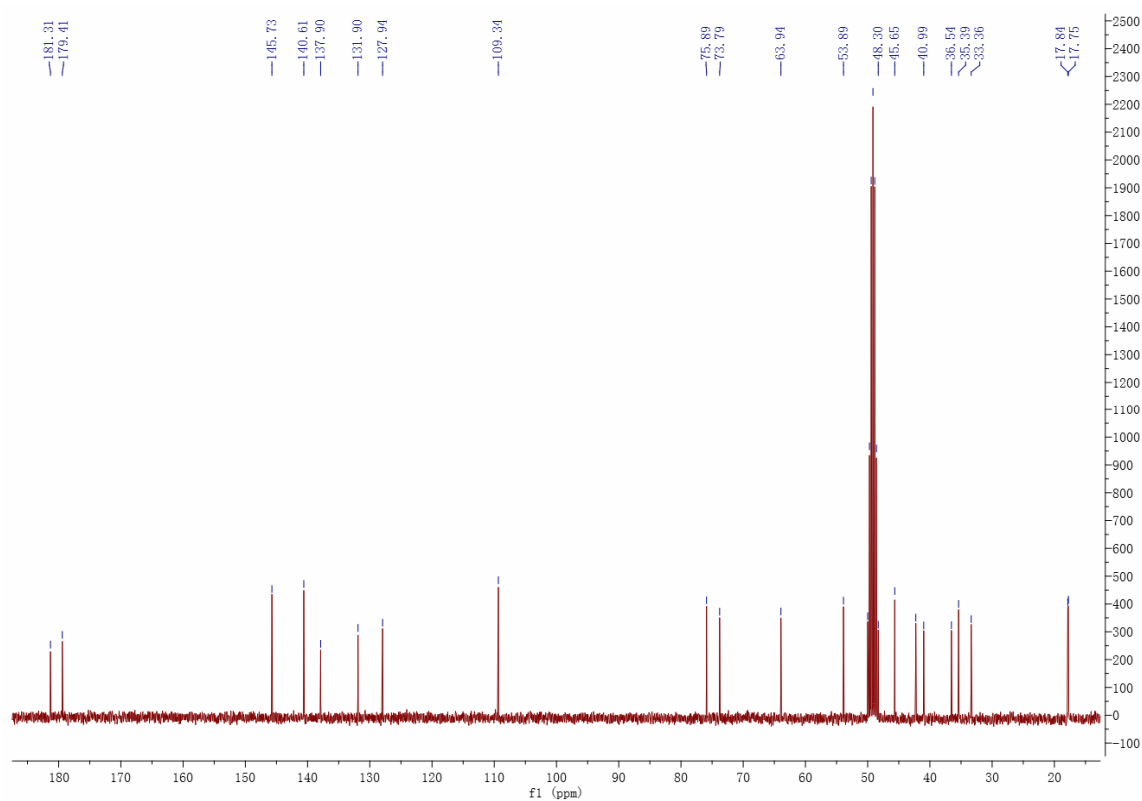

**S11.**  $^1\text{H}$  NMR spectrum (400 MHz) of compound **6** in  $\text{CD}_3\text{OD}$

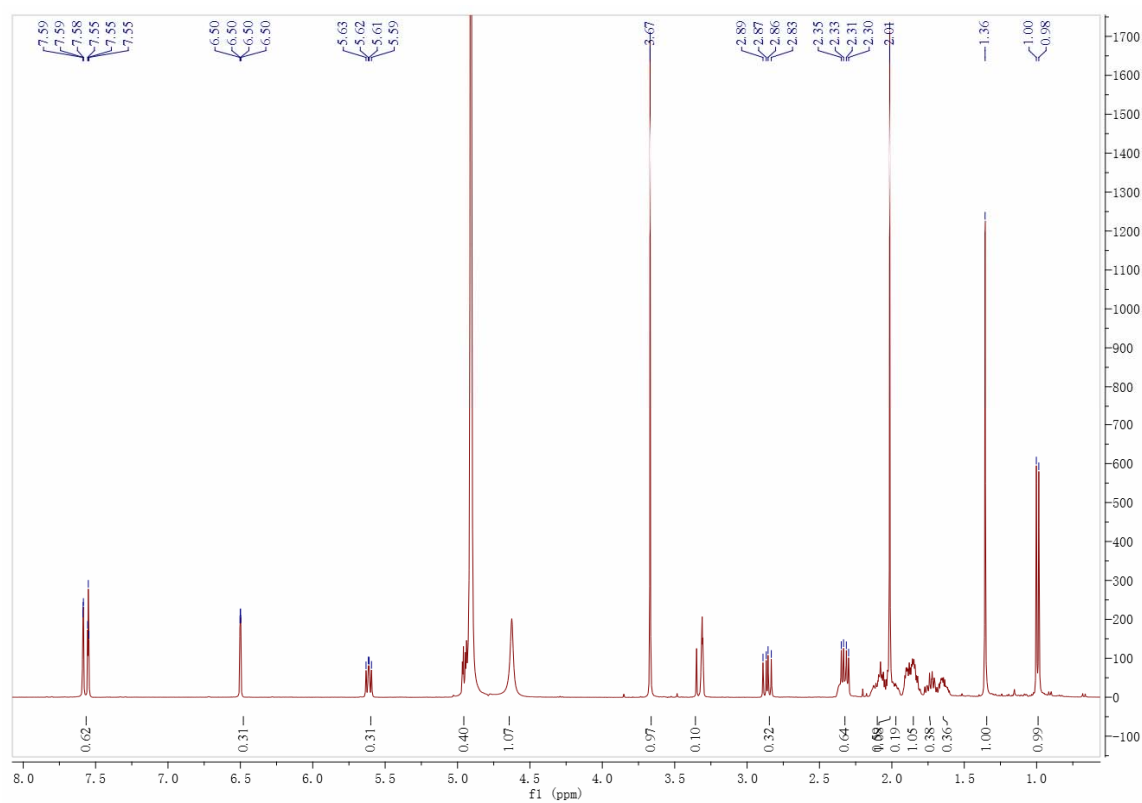

**S12.**  $^{13}\text{C}$  NMR spectrum (100 MHz) of compound **6** in  $\text{CD}_3\text{OD}$

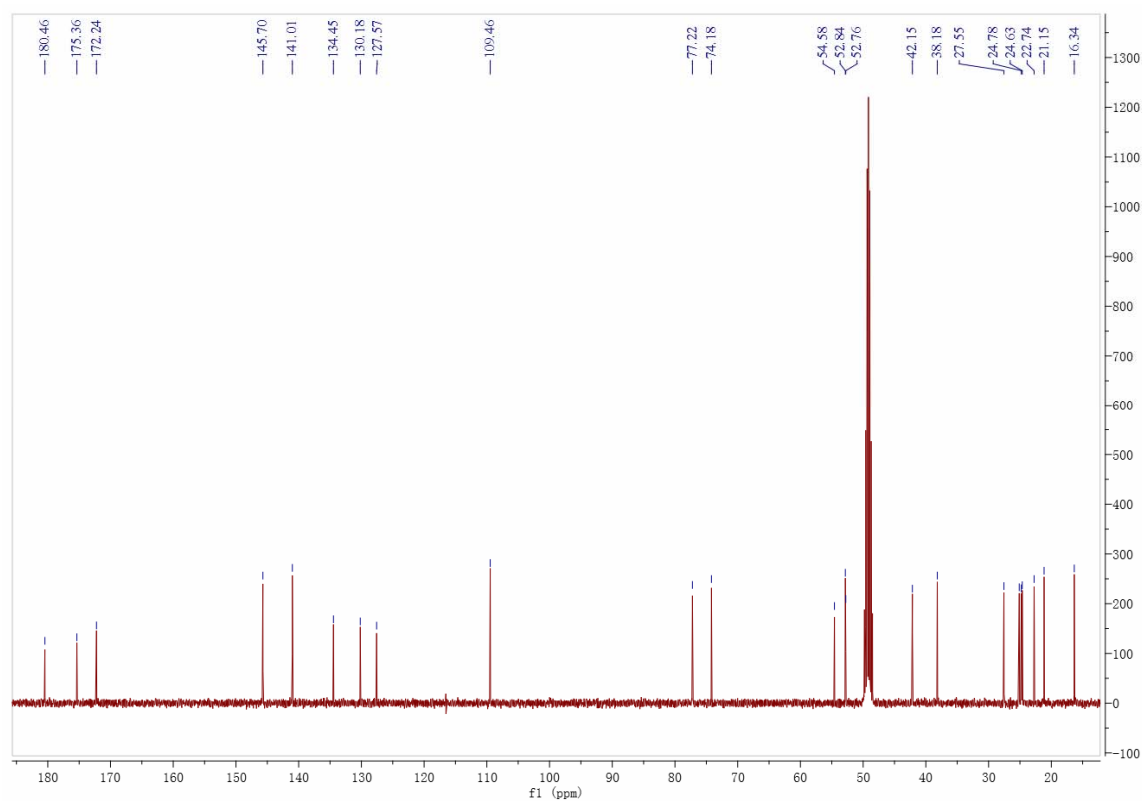



**S13.**  $^1\text{H}$  NMR spectrum (400 MHz) of compound **7** in  $\text{CD}_3\text{OD}$

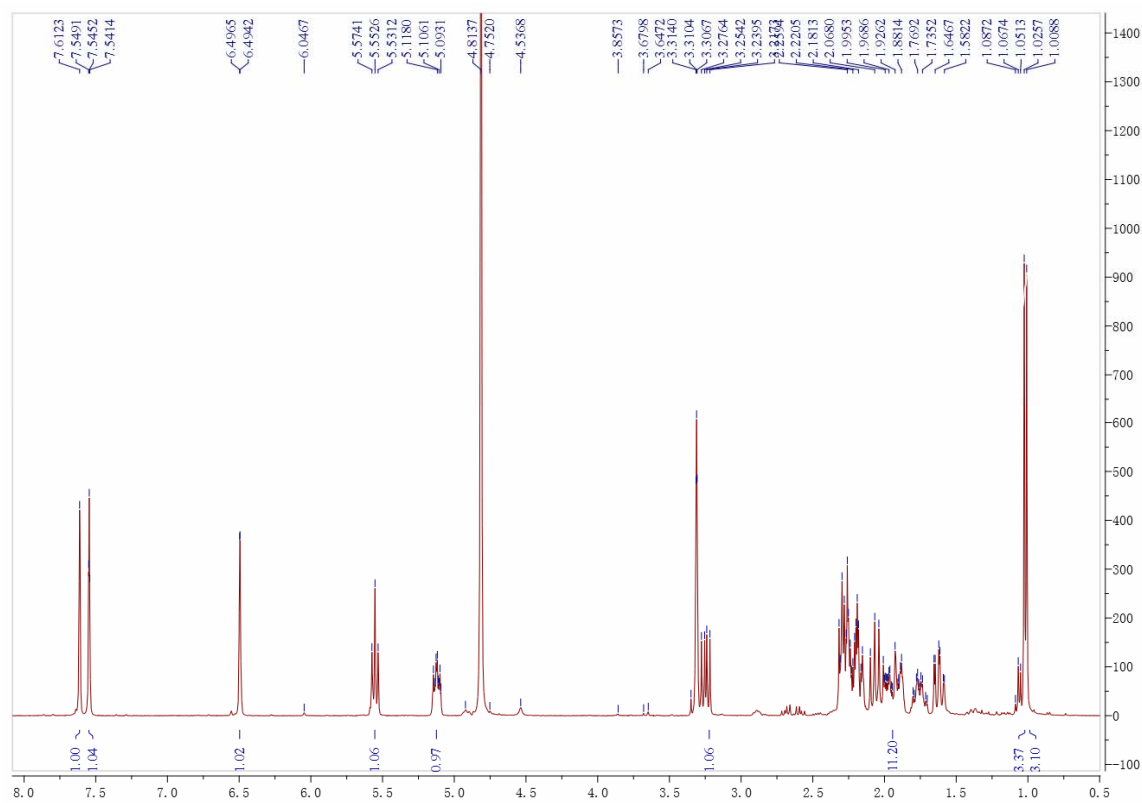

**S14.**  $^{13}\text{C}$  NMR spectrum (100 MHz) of compound **7** in  $\text{CD}_3\text{OD}$

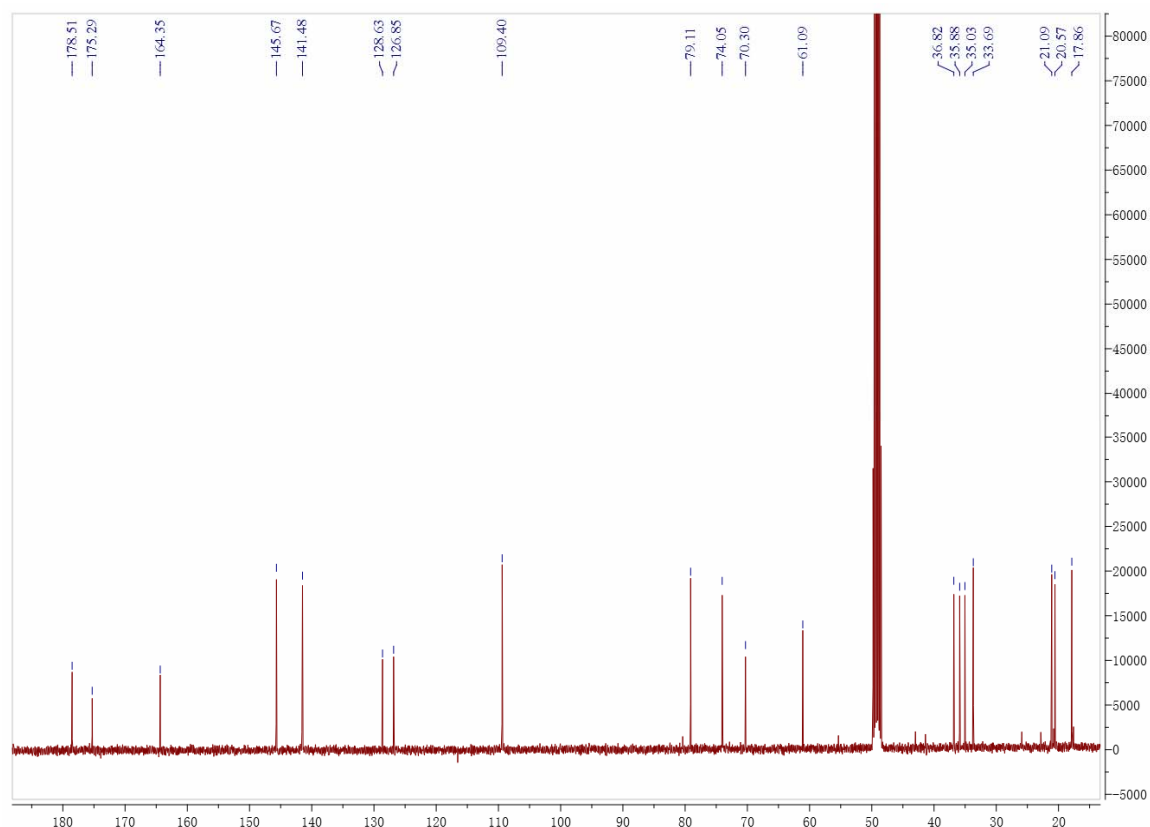

**S15. CD spectra of 4-8 and 13**

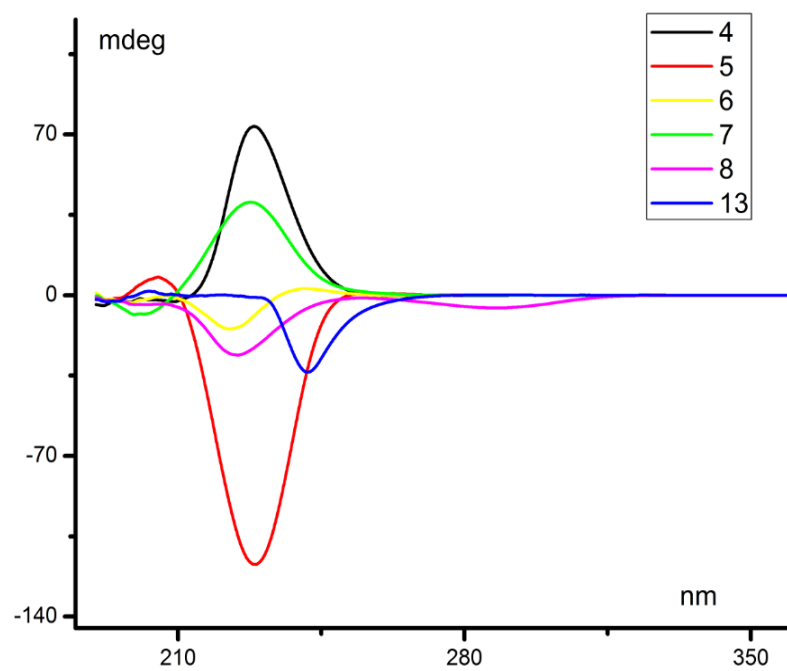

Supplement: Supplementary file 1 [file 4099567]
